# Supplementary material
Source: publisher site journal article supplement (https://www.dovepress.com/article/364051)
Supplement: Supplementary file 1 [file get_supplementary_file.php]

**Table S1. Correlation between CHI-NEI-VFQ-25 subscale and composite scores and parameters**

|  | **General Health** |  | **General Vision** |  | **Ocular Pain** |  | **Near Activities** |  | **Distance Activities** |  | **Social Functioning** |  | **Mental Health** |  | **Role Difficulties** |  | **Dependency** |  | **Driving** |  | **Color Vision** |  | **Peripheral Vision** |  | **Composite score** |  |
| --- | --- | --- | --- | --- | --- | --- | --- | --- | --- | --- | --- | --- | --- | --- | --- | --- | --- | --- | --- | --- | --- | --- | --- | --- | --- | --- |
|  | ρ | P | ρ | P | ρ | P | ρ | P | ρ | P | ρ | P | ρ | P | ρ | P | ρ | P | ρ | P | ρ | P | ρ | P | ρ | P |
| RNFL |  |  |  |  |  |  |  |  |  |  |  |  |  |  |  |  |  |  |  |  |  |  |  |  |  |  |
| pST | -0.266 | 0.286 | 0.165 | 0.513 | -0.223 | 0.373 | -0.266 | 0.287 | -0.332 | 0.179 | -0.171 | 0.498 | 0.205 | 0.415 | -0.189 | 0.452 | 0.057 | 0.823 | 0.042 | 0.869 | 0.020 | 0.936 | -0.158 | 0.531 | -0.091 | 0.720 |
| pSN | -0.354 | 0.150 | -0.210 | 0.403 | -0.061 | 0.811 | -0.322 | 0.192 | -0.417 | 0.085 | -0.112 | 0.659 | 0.278 | 0.264 | 0.075 | 0.768 | 0.250 | 0.317 | -0.303 | 0.221 | -0.094 | 0.712 | -0.214 | 0.393 | 0.015 | 0.953 |
| pNU | -0.239 | 0.339 | -0.113 | 0.656 | 0.060 | 0.813 | -0.352 | 0.152 | -0.437 | 0.070 | -0.012 | 0.962 | 0.203 | 0.420 | 0.038 | 0.881 | 0.212 | 0.399 | -0.001 | 0.996 | 0.191 | 0.448 | -0.093 | 0.713 | 0.048 | 0.849 |
| pNL | -0.345 | 0.161 | -0.184 | 0.466 | 0.386 | 0.113 | -0.438 | 0.069 | -0.289 | 0.245 | 0.001 | 0.997 | 0.247 | 0.323 | 0.149 | 0.554 | 0.390 | 0.109 | 0.077 | 0.762 | -0.031 | 0.902 | -0.078 | 0.758 | 0.177 | 0.482 |
| pIN | -0.389 | 0.111 | -0.374 | 0.126 | 0.474 | **0.047** | -0.468 | 0.050 | -0.390 | 0.110 | 0.044 | 0.861 | 0.205 | 0.414 | 0.347 | 0.158 | 0.374 | 0.127 | -0.044 | 0.861 | -0.131 | 0.604 | -0.175 | 0.488 | 0.159 | 0.528 |
| pIT | -0.385 | 0.115 | -0.136 | 0.589 | 0.240 | 0.337 | -0.414 | 0.087 | -0.283 | 0.256 | -0.014 | 0.956 | 0.311 | 0.210 | 0.125 | 0.621 | 0.330 | 0.181 | 0.073 | 0.775 | 0.093 | 0.714 | -0.044 | 0.861 | 0.153 | 0.545 |
| pTL | -0.348 | 0.157 | -0.031 | 0.903 | 0.216 | 0.390 | -0.484 | **0.042** | -0.230 | 0.359 | -0.133 | 0.599 | -0.062 | 0.807 | 0.100 | 0.693 | 0.063 | 0.803 | -0.167 | 0.508 | -0.182 | 0.470 | -0.392 | 0.108 | -0.104 | 0.682 |
| pTU | -0.003 | 0.992 | 0.082 | 0.748 | 0.009 | 0.973 | -0.323 | 0.192 | -0.131 | 0.605 | -0.094 | 0.712 | 0.209 | 0.406 | -0.068 | 0.789 | 0.125 | 0.622 | -0.226 | 0.366 | 0.203 | 0.418 | -0.026 | 0.919 | 0.048 | 0.850 |
| VD |  |  |  |  |  |  |  |  |  |  |  |  |  |  |  |  |  |  |  |  |  |  |  |  |  |  |
| ST | -0.533 | **0.023** | -0.147 | 0.560 | 0.332 | 0.178 | -0.017 | 0.946 | -0.005 | 0.983 | 0.092 | 0.717 | 0.083 | 0.742 | 0.293 | 0.238 | 0.200 | 0.426 | 0.151 | 0.549 | -0.380 | 0.120 | -0.007 | 0.977 | 0.127 | 0.617 |
| SN | -0.174 | 0.491 | -0.195 | 0.437 | -0.131 | 0.605 | -0.189 | 0.453 | -0.183 | 0.468 | -0.149 | 0.554 | 0.219 | 0.382 | -0.085 | 0.739 | 0.098 | 0.699 | -0.299 | 0.228 | -0.247 | 0.324 | -0.046 | 0.856 | -0.033 | 0.898 |
| NS | -0.340 | 0.168 | -0.137 | 0.589 | 0.179 | 0.478 | -0.073 | 0.773 | 0.038 | 0.880 | 0.221 | 0.377 | 0.324 | 0.189 | 0.046 | 0.855 | 0.310 | 0.211 | -0.122 | 0.630 | 0.020 | 0.937 | 0.159 | 0.530 | 0.247 | 0.323 |
| NI | -0.263 | 0.291 | 0.257 | 0.303 | 0.063 | 0.803 | -0.108 | 0.671 | -0.033 | 0.896 | 0.035 | 0.891 | 0.552 | **0.018** | -0.029 | 0.909 | 0.439 | 0.068 | -0.125 | 0.622 | 0.104 | 0.680 | -0.081 | 0.748 | 0.298 | 0.230 |
| IN | -0.343 | 0.163 | 0.016 | 0.949 | -0.007 | 0.978 | -0.159 | 0.528 | -0.083 | 0.743 | -0.058 | 0.820 | 0.596 | **0.009** | 0.097 | 0.701 | 0.436 | 0.071 | -0.264 | 0.290 | 0.059 | 0.815 | 0.005 | 0.986 | 0.281 | 0.260 |
| IT | -0.354 | 0.150 | -0.037 | 0.885 | 0.149 | 0.554 | -0.430 | 0.075 | -0.299 | 0.228 | -0.153 | 0.544 | 0.453 | 0.059 | 0.045 | 0.858 | 0.329 | 0.182 | -0.121 | 0.634 | -0.043 | 0.866 | -0.131 | 0.604 | 0.137 | 0.587 |
| TI | -0.428 | 0.077 | 0.085 | 0.738 | 0.446 | 0.064 | -0.349 | 0.156 | -0.466 | 0.051 | -0.176 | 0.485 | -0.014 | 0.956 | 0.193 | 0.442 | 0.136 | 0.590 | 0.305 | 0.219 | -0.243 | 0.331 | -0.195 | 0.438 | -0.024 | 0.924 |
| TS | -0.364 | 0.137 | 0.094 | 0.710 | 0.502 | **0.034** | -0.206 | 0.412 | -0.509 | **0.031** | -0.157 | 0.533 | -0.088 | 0.730 | 0.320 | 0.195 | 0.110 | 0.663 | 0.215 | 0.392 | -0.290 | 0.243 | -0.241 | 0.335 | -0.013 | 0.959 |
| VF |  |  |  |  |  |  |  |  |  |  |  |  |  |  |  |  |  |  |  |  |  |  |  |  |  |  |
| VFI% | 0.157 | 0.533 | -0.018 | 0.945 | -0.135 | 0.594 | 0.335 | 0.174 | 0.466 | 0.051 | 0.320 | 0.196 | 0.097 | 0.703 | 0.072 | 0.778 | -0.045 | 0.859 | -0.379 | 0.121 | 0.080 | 0.753 | 0.358 | 0.144 | 0.157 | 0.534 |
| MD (dB) | -0.047 | 0.853 | -0.026 | 0.919 | -0.059 | 0.816 | 0.299 | 0.227 | 0.284 | 0.254 | 0.260 | 0.298 | 0.114 | 0.653 | 0.148 | 0.557 | 0.033 | 0.896 | -0.364 | 0.137 | -0.078 | 0.758 | 0.195 | 0.437 | 0.147 | 0.560 |
| PSD (dB) | 0.350 | 0.155 | 0.116 | 0.646 | 0.366 | 0.135 | 0.243 | 0.330 | 0.146 | 0.565 | 0.146 | 0.564 | 0.136 | 0.592 | 0.341 | 0.166 | 0.109 | 0.668 | 0.165 | 0.513 | 0.204 | 0.416 | 0.275 | 0.270 | 0.309 | 0.212 |
| FVEP |  |  |  |  |  |  |  |  |  |  |  |  |  |  |  |  |  |  |  |  |  |  |  |  |  |  |
| LP100 | -0.021 | 0.933 | 0.205 | 0.414 | -0.109 | 0.666 | -0.181 | 0.473 | -0.198 | 0.432 | -0.031 | 0.902 | 0.234 | 0.350 | -0.228 | 0.363 | -0.004 | 0.988 | 0.214 | 0.394 | 0.247 | 0.323 | -0.278 | 0.265 | -0.044 | 0.861 |
| AP100 | 0.373 | 0.128 | 0.157 | 0.534 | -0.129 | 0.609 | 0.307 | 0.215 | 0.192 | 0.444 | 0.025 | 0.920 | -0.094 | 0.711 | 0.072 | 0.778 | -0.125 | 0.622 | 0.049 | 0.846 | 0.015 | 0.952 | 0.068 | 0.790 | 0.022 | 0.931 |

FVEP: Flash visual evoked potentials; RNFL: retinal nerve fiber layer; VF: visual field; MD: mean deviation; PSD: pattern standard deviation; NAION: non-arteritic anterior ischemic optic neuropathy; pTU: peripapillary temporal upper; pST: peripapillary superior temporal; pSN: peripapillary superior nasal; pNU: peripapillary nasal upper; pNL: peripapillary nasal lower; pIN: peripapillary inferior nasal; pIT: peripapillary inferior temporal; pTL: peripapillary temporal lower; NS: nasal superior; NI: nasal inferior; IN: inferior nasal; IT: inferior temporal; TI: temporal inferior; TS: temporal superior; ST: superior temporal; SN: superior nasal.
